# Supplementary material
Source: publisher site journal article supplement (https://www.dovepress.com/article/312085)
Supplement: Supplementary file 1 [file get_supplementary_file.php]

**Table S1. The primer sequence.**

| Primer | Sequence (5’-3’) |
| --- | --- |
| CPNE8-hF | GCCCACCAACTTTGCTCCT |
| CPNE8-hR | TCTCCATCCAATTCGACCATT |
| FGR-hF | GAAAGCGAGACCACCAAAGG |
| FGR-hR | TGATGTAGTAGCCGCCCATG |
| FZD8-hF | CAACCAGAGCCTGGACAACC |
| FZD8-hR | GATGCGGAAGAGGGACACG |
| GAMT-hF | CCTGTGGGAGGATGTGGCA |
| GAMT-hR | GCGAAAGGCGTGGTTCTTG |
| JAM2-hF | GCTCCCAAAGCACCAACAGC |
| JAM2-hR | TTGCGGGCTTCACAGGAAT |
| POMC-hF | GTTGCTGGCCTTGCTGCTT |
| POMC-hR | CCGTGGTGAGGTCCTGACACT |
| PRDM6-hF | GGCATCTTTGGAAATGTGGG |
| PRDM6-hR | TGTGGTTGTTGAGGGTGGTG |
| PRKAA2-hF | ACATGAATGCCAAGATAGCCG |
| PRKAA2-hR | ATGGGAGGGTGCCACAAAG |
| TAL1-hF | ACCAAAGTTGTGCGGCGTAT |
| TAL1-hR | CCCTCCTCCTCCTGGTCATT |
| TMIE-hF | TTTTCGCTCTTCGTGTTGTCC |
| TMIE-hR | CGGGCTTCGATCTCCTTCC |
| GAPDH-hF | TGACAACTTTGGTATCGTGGAAGG |
| GAPDH-hR | AGGCAGGGATGATGTTCTGGAGAG |

**Table S2. Results of DMGs mapping onto modules of WGCNA algorithm.**

| ID | Color | Module size | #DMGs | Enrichment infor | |
| --- | --- | --- | --- | --- | --- |
| Enrichment fold[95%CI] | Phyper |
| module 1 | black | 189 | 68 | 2.011[1.488-2.691] | 6.11E-06 |
| module 2 | blue | 292 | 199 | 3.808[3.123-4.636] | 2.20E-16 |
| module 3 | brown | 257 | 24 | 0.522[0.327-0.799] | 1.48E-03 |
| module 4 | green | 217 | 5 | 0.129[0.0413-0.306] | 4.44E-10 |
| module 5 | grey | 3192 | 397 | 0.695[0.612-0.788] | 7.39E-09 |
| module 6 | magenta | 154 | 89 | 2.448[1.857-3.206] | 4.23E-10 |
| module 7 | pink | 172 | 4 | 0.130[0.0350-0.340] | 3.34E-08 |
| module 8 | purple | 150 | 1 | 0.0373[ 0.000940-0.211] | 9.11E-10 |
| module 9 | red | 196 | 165 | 4.703[3.757-5.883] | 2.20E-16 |
| module 10 | turquoise | 344 | 9 | 0.146[0.0661-0.282] | 2.00E-14 |
| module 11 | yellow | 219 | 2 | 0.0510[0.00614-0.187] | 4.76E-13 |

**Table S3. Prognosis-related DMGs screened by univariate Cox regression analysis.**

| Symbol | coef | exp(coef) | se(coef) | z | *p* |
| --- | --- | --- | --- | --- | --- |
| PRDM6 | 1.49 | 4.42 | 0.76 | 1.96 | 0.005 |
| GAMT | 1.37 | 3.93 | 0.71 | 1.93 | 0.0054 |
| CPNE8 | 1.43 | 4.16 | 0.824 | 1.73 | 0.0084 |
| NAP1L2 | -1.22 | 0.296 | 0.719 | -1.7 | 0.009 |
| ADAMTS8 | 1.18 | 3.25 | 0.702 | 1.68 | 0.0093 |
| TAL1 | 1.53 | 4.63 | 0.917 | 1.67 | 0.0095 |
| SFRP2 | 1.94 | 6.99 | 1.19 | 1.63 | 0.01 |
| SCNN1B | 1.46 | 4.29 | 0.959 | 1.52 | 0.013 |
| SSTR2 | 0.883 | 2.42 | 0.645 | 1.37 | 0.017 |
| PPP1R14A | 0.923 | 2.52 | 0.686 | 1.34 | 0.018 |
| EFEMP1 | 1.68 | 5.37 | 1.27 | 1.32 | 0.019 |
| RARRES2 | 1.5 | 4.48 | 1.13 | 1.32 | 0.019 |
| ARHGAP6 | 1.45 | 4.26 | 1.15 | 1.26 | 0.021 |
| FZD8 | -1.26 | 0.284 | 0.994 | -1.27 | 0.021 |
| SNAI2 | 1.16 | 3.2 | 0.917 | 1.27 | 0.021 |
| AMPH | 1.46 | 4.31 | 1.18 | 1.24 | 0.022 |
| ZNF132 | 1.65 | 5.21 | 1.35 | 1.23 | 0.022 |
| SCGN | 1.2 | 3.31 | 1.01 | 1.19 | 0.023 |
| ZNF569 | -0.842 | 0.431 | 0.703 | -1.2 | 0.023 |
| ZNF793 | -0.844 | 0.43 | 0.718 | -1.18 | 0.024 |
| FST | 0.946 | 2.57 | 0.828 | 1.14 | 0.025 |
| GDNF | 1.81 | 6.11 | 1.56 | 1.16 | 0.025 |
| ZNF781 | -0.836 | 0.434 | 0.726 | -1.15 | 0.025 |
| FKBP1B | 1.07 | 2.91 | 0.944 | 1.13 | 0.026 |
| ABHD8 | -1.37 | 0.254 | 1.25 | -1.1 | 0.027 |
| MN1 | -0.833 | 0.435 | 0.771 | -1.08 | 0.028 |
| ZNF829 | 1.22 | 3.39 | 1.13 | 1.08 | 0.028 |
| EIF4E3 | -1.4 | 0.247 | 1.35 | -1.04 | 0.03 |
| JAM2 | -0.917 | 0.4 | 0.935 | -0.98 | 0.033 |
| RASL12 | 0.793 | 2.21 | 0.808 | 0.981 | 0.033 |
| WASF3 | 0.781 | 2.18 | 0.808 | 0.967 | 0.033 |
| EFS | 1.14 | 3.13 | 1.19 | 0.96 | 0.034 |
| GBGT1 | 1.27 | 3.55 | 1.32 | 0.959 | 0.034 |
| RRAD | 0.848 | 2.34 | 0.89 | 0.953 | 0.034 |
| PRKAA2 | 0.512 | 1.67 | 0.542 | 0.944 | 0.035 |
| RBP7 | 0.859 | 2.36 | 0.965 | 0.89 | 0.037 |
| ABCB1 | 0.767 | 2.15 | 0.866 | 0.885 | 0.038 |
| GREM1 | 0.632 | 1.88 | 0.72 | 0.879 | 0.038 |
| TMIE | -0.688 | 0.503 | 0.782 | -0.879 | 0.038 |
| OLFM1 | -0.836 | 0.433 | 0.971 | -0.861 | 0.039 |
| ZNF461 | -0.527 | 0.59 | 0.611 | -0.863 | 0.039 |
| HS3ST2 | -1.08 | 0.341 | 1.29 | -0.836 | 0.04 |
| PCP4L1 | 0.525 | 1.69 | 0.629 | 0.833 | 0.04 |
| SLC24A3 | 0.792 | 2.21 | 0.999 | 0.793 | 0.043 |
| FGR | -0.625 | 0.535 | 0.807 | -0.774 | 0.044 |
| PAPLN | 0.586 | 1.8 | 0.775 | 0.756 | 0.045 |
| NHSL2 | -0.596 | 0.551 | 0.801 | -0.744 | 0.046 |
| HIC1 | 0.632 | 1.88 | 0.872 | 0.725 | 0.047 |
| POMC | -0.613 | 0.542 | 0.846 | -0.724 | 0.047 |
| CPAMD8 | 0.802 | 2.23 | 1.14 | 0.703 | 0.048 |
| UBE2QL1 | -0.643 | 0.525 | 0.902 | -0.713 | 0.048 |

**Table S4. 24 independent prognostic DMGs.**

| Symbol | coef | Pr(>|z|) | Hazard Ratio | lower0.95 | upper0.95 |
| --- | --- | --- | --- | --- | --- |
| GAMT | 1.956452 | 0.000166 | 7.074186 | 2.5548554 | 19.5878 |
| JAM2 | -2.31195 | 0.000566 | 0.099068 | 0.0266108 | 0.3688 |
| TAL1 | 2.219345 | 0.000801 | 9.201299 | 2.5139996 | 33.677 |
| POMC | -4.043596 | 0.000849 | 0.017534 | 0.00163 | 0.1886 |
| PAPLN | -5.411895 | 0.001431 | 0.004463 | 0.0001602 | 0.1243 |
| RRAD | 2.436359 | 0.001779 | 11.43134 | 2.4799794 | 52.6922 |
| FKBP1B | -3.993441 | 0.002201 | 0.018436 | 0.0014303 | 0.2376 |
| PRDM6 | 4.436185 | 0.002605 | 84.452172 | 4.7040143 | 151.61878 |
| GDNF | 2.251809 | 0.00328 | 9.504916 | 2.1185417 | 42.6442 |
| RASL12 | 2.228156 | 0.007624 | 9.282735 | 1.8066862 | 47.6946 |
| FGR | -1.850366 | 0.008035 | 0.15718 | 0.0400103 | 0.6175 |
| TMIE | -2.278445 | 0.008059 | 0.102443 | 0.0189895 | 0.5527 |
| SSTR2 | -1.30498 | 0.009103 | 0.271178 | 0.1017087 | 0.723 |
| HS3ST2 | -1.458679 | 0.010654 | 0.232543 | 0.0759143 | 0.7123 |
| PRKAA2 | 0.988692 | 0.011566 | 2.687716 | 1.2476762 | 5.7898 |
| EIF4E3 | -1.102808 | 0.01603 | 0.331938 | 0.1352895 | 0.8144 |
| SCGN | -2.328724 | 0.022858 | 0.09742 | 0.0131115 | 0.7238 |
| HIC1 | -1.653708 | 0.02319 | 0.191339 | 0.0458962 | 0.7977 |
| GREM1 | -1.794467 | 0.02771 | 0.166216 | 0.0336362 | 0.8214 |
| EFS | 1.932588 | 0.028996 | 6.907362 | 1.2188123 | 39.146 |
| CPNE8 | 1.375908 | 0.030083 | 3.95867 | 1.141792 | 13.725 |
| FZD8 | -1.963578 | 0.030162 | 0.140355 | 0.0237832 | 0.8283 |
| PCP4L1 | 0.761328 | 0.037702 | 2.141118 | 1.0442239 | 4.3902 |
| SLC24A3 | 2.113685 | 0.048381 | 8.278695 | 1.0151534 | 67.5137 |

**Table S5. The parameters of ROC curve for different prognostic models.**

| Type | AUROC (95% CI) | C-index | *p* Value |
| --- | --- | --- | --- |
| Recurrence model | 0.564 (0.569,0.823) | 0.561 | 5.830E-02 |
| Prognostic score model | 0.890 (0.861,0.881) | 0.715 | 9.48E-10 |
| Combine model | 0.912 (0.875,0.875) | 0.747 | 3.14E-13 |

**
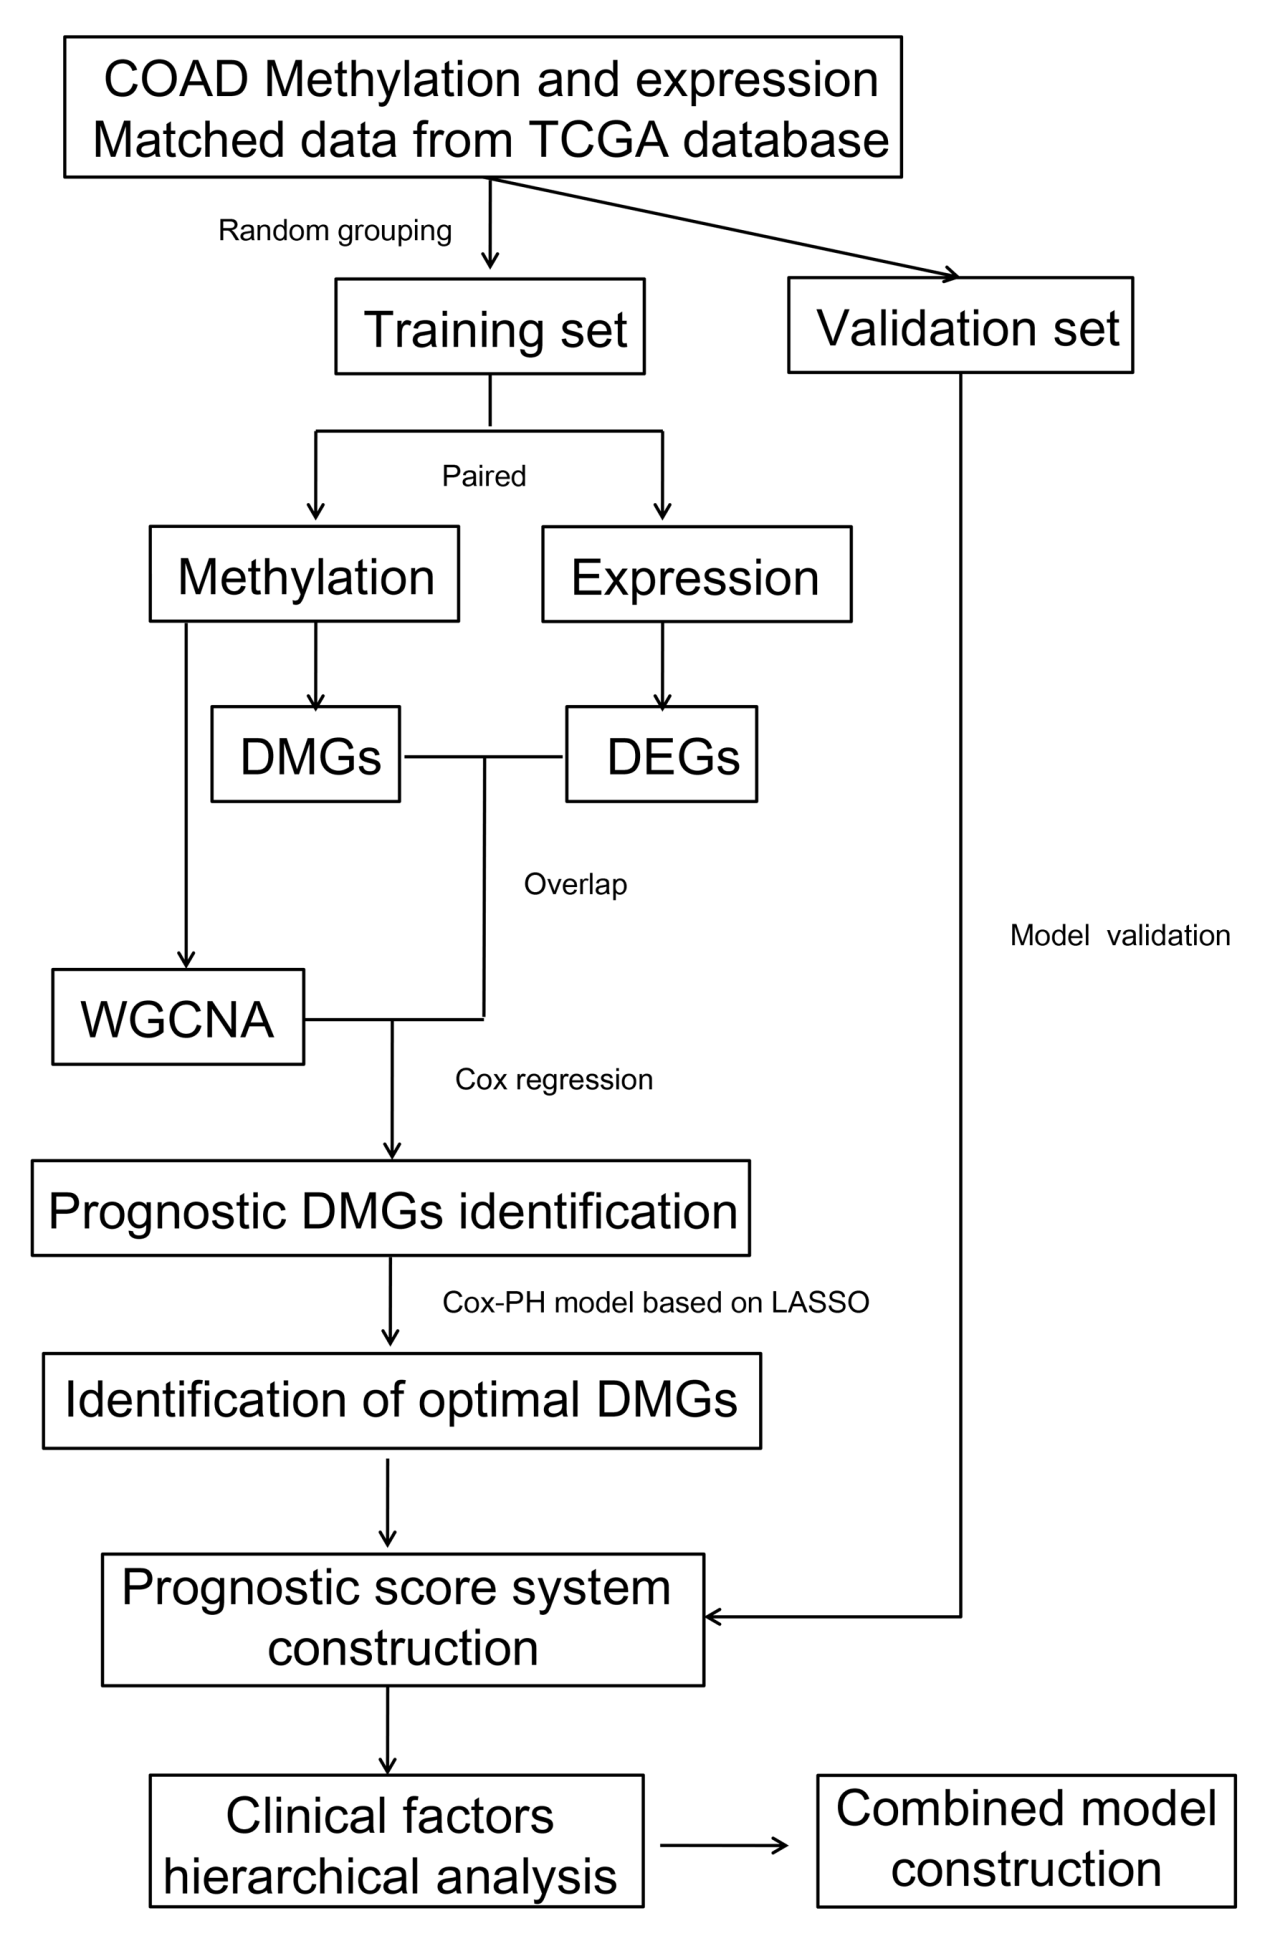
Figure S1** Workflow of this study.

**
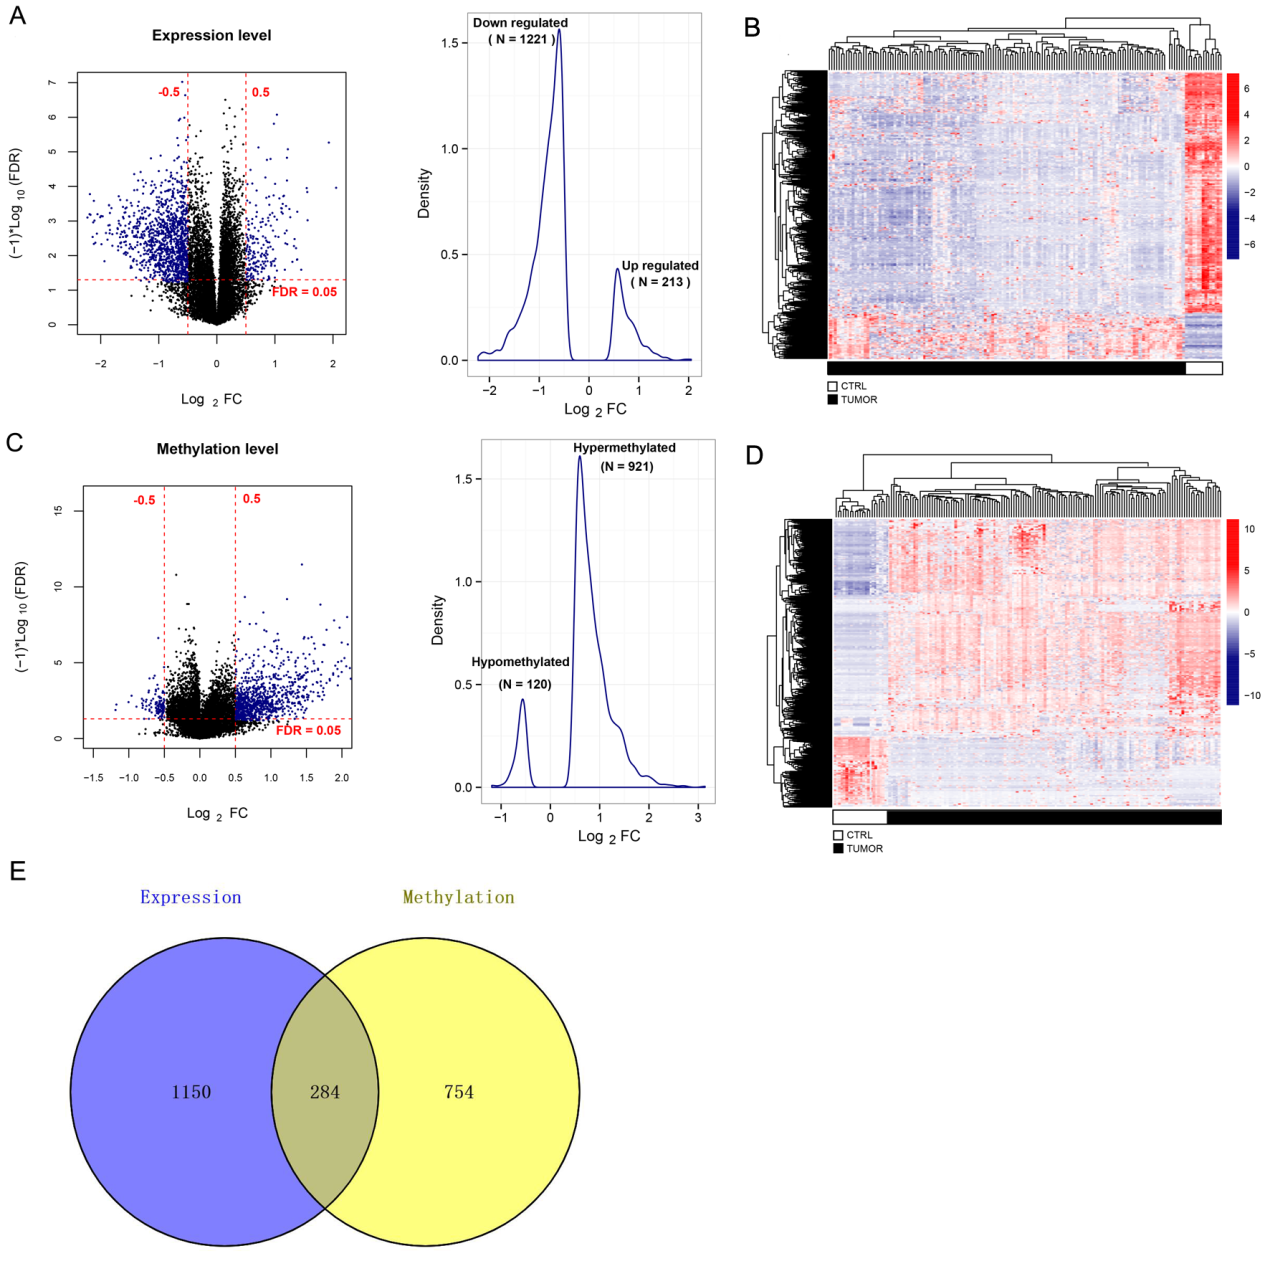
Figure S2** Differential gene expression and methylation analyses. Volcano plot (**A**) and heatmaps (**B**) of differentially expressed genes (DEGs). Volcano plot (**C**) and heatmaps (**D**) of differentially methylated genes (DMGs). In the volcano plots, the blue dots represent DEGs with |log2FC| > 0.5 and FDR < 0.05. Distribution curves show the numbers of DEGs and DMGs. In the heatmaps, the white and black blocks in the lower part represent normal and tumor samples, respectively. (**E**) Venn plot showing the overlapping DEGs and DMGs.

**
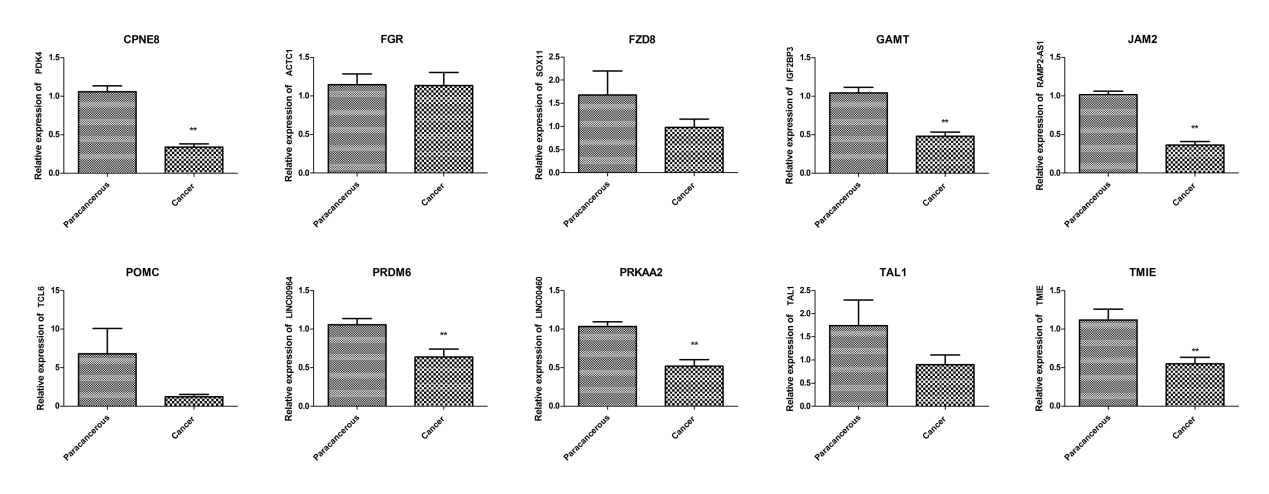
Figure S3** RT-qPCR validation results. ** represents *p* < 0.01.
